# Supplementary material for: Human iPSC-Derived Neuronal Cells From CTBP1-Mutated Patients Reveal Altered Expression of Neurodevelopmental Gene Networks
Source: PubMed Central journal article supplement (PMC7653094; doi:10.3389/fnins.2020.562292), 2020-10-27

| ensembl_ID      | Gene    | Description                                                       | logFC     | P.Value   | adj.P.Val  | transcript_count | module Color  |
|-----------------|---------|-------------------------------------------------------------------|-----------|-----------|------------|------------------|---------------|
| ENSG00000234745 | HLA-B   | major histocompatibility complex, class I, B                      | -6.105925 | 1.50E-13  | 7.99E-10   | 10               | darkturquoise |
| ENSG00000188487 | INSC    | INSC, spindle orientation adaptor protein                         | -4.250442 | 8.18E-10  | 2.81E-07   | 8                | darkturquoise |
| ENSG00000157601 | MX1     | MX dynamin like GTPase 1                                          | -3.274864 | 1.73E-11  | 2.51E-08   | 18               | darkturquoise |
| ENSG00000115665 | SLC5A7  | solute carrier family 5 member 7                                  | -3.151444 | 5.46E-10  | 2.48E-07   | 2                | royalblue     |
| ENSG00000111335 | OAS2    | 2'-5'-oligoadenylate synthetase 2                                 | -3.063191 | 2.19E-07  | 1.06E-05   | 7                | darkturquoise |
| ENSG00000089127 | OAS1    | 2'-5'-oligoadenylate synthetase 1                                 | -3.011778 | 1.70E-09  | 4.62E-07   | 11               | darkturquoise |
| ENSG00000187608 | ISG15   | ISG15 ubiquitin-like modifier                                     | -2.856704 | 6.49E-14  | 5.18E-10   | 3                | darkturquoise |
| ENSG00000163064 | EN1     | engrailed homeobox 1                                              | -2.769127 | 2.19E-10  | 1.51E-07   | 2                | royalblue     |
| ENSG00000111331 | OAS3    | 2'-5'-oligoadenylate synthetase 3                                 | -2.750136 | 6.17E-10  | 2.59E-07   | 7                | darkturquoise |
| ENSG00000185585 | OLFML2A | olfactomedin like 2A                                              | -2.686831 | 2.42E-09  | 5.68E-07   | 3                | royalblue     |
| ENSG00000130303 | BST2    | bone marrow stromal cell antigen 2                                | -2.508783 | 6.82E-09  | 1.11E-06   | 3                | darkturquoise |
| ENSG00000095596 | CYP26A1 | cytochrome P450 family 26 subfamily A member 1                    | -2.485809 | 7.20E-10  | 2.73E-07   | 6                | darkturquoise |
| ENSG00000126709 | IFI6    | interferon alpha inducible protein 6                              | -2.445744 | 3.61E-15  | 5.76E-11   | 3                | darkturquoise |
| ENSG00000185745 | IFIT1   | interferon induced protein with tetratricopeptide repeats 1       | -2.286596 | 8.43E-12  | 1.35E-08   | 2                | royalblue     |
| ENSG00000168875 | SOX14   | SRY-box 14                                                        | -2.276696 | 1.81E-07  | 9.32E-06   | 1                | darkturquoise |
| ENSG00000162367 | TAL1    | TAL bHLH transcription factor 1, erythroid differentiation factor | -2.204478 | 1.83E-08  | 2.09E-06   | 6                | darkturquoise |
| ENSG00000244405 | ETV5    | ETS variant 5                                                     | -2.196398 | 4.38E-09  | 8.12E-07   | 14               | darkturquoise |
| ENSG00000145242 | EPHA5   | EPH receptor A5                                                   | -1.950151 | 4.77E-12  | 1.09E-08   | 6                | blue          |
| ENSG00000119917 | IFIT3   | interferon induced protein with tetratricopeptide repeats 3       | -1.830613 | 3.20E-09  | 6.54E-07   | 2                | darkturquoise |
| ENSG00000154162 | CDH12   | cadherin 12                                                       | -1.792625 | 1.66E-07  | 8.74E-06   | 8                | darkturquoise |
| ENSG00000119922 | IFIT2   | interferon induced protein with tetratricopeptide repeats 2       | -1.602502 | 6.42E-06  | 0.00012146 | 3                | darkgreen     |
| ENSG00000146013 | GFRA3   | GDNF family receptor alpha 3                                      | -1.505017 | 1.75E-06  | 4.69E-05   | 2                | darkturquoise |
| ENSG00000040731 | CDH10   | cadherin 10                                                       | -1.503027 | 7.77E-10  | 2.81E-07   | 4                | darkturquoise |
| ENSG00000082397 | EPB41L3 | erythrocyte membrane protein band 4.1 like 3                      | -1.450606 | 3.65E-11  | 4.16E-08   | 36               | darkturquoise |
| ENSG00000167178 | ISLR2   | immunoglobulin superfamily containing leucine rich repeat 2       | -1.288987 | 2.00E-07  | 1.01E-05   | 12               | darkturquoise |
| ENSG00000198797 | BRINP2  | BMP/retinoic acid inducible neural specific 2                     | -1.231636 | 0.0008689 | 0.00386602 | 3                | darkturquoise |
| ENSG00000149571 | KIRREL3 | kirre like nephrin family adhesion molecule 3                     | -1.220109 | 2.16E-08  | 2.34E-06   | 9                | darkturquoise |
| ENSG00000213928 | IRF9    | interferon regulatory factor 9                                    | -1.212617 | 2.35E-06  | 5.90E-05   | 15               | darkturquoise |
| ENSG00000120049 | KCNIP2  | potassium voltage-gated channel interacting protein 2             | -1.172459 | 3.39E-06  | 7.64E-05   | 14               | darkturquoise |
| ENSG00000254245 | PCDHGA3 | protocadherin gamma subfamily A, 3                                | -1.148602 | 0.0003724 | 0.00205432 | 3                | darkturquoise |
| ENSG00000115415 | STAT1   | signal transducer and activator of transcription 1                | -1.087111 | 4.88E-10  | 2.36E-07   | 12               | royalblue     |
| ENSG00000159899 | NPR2    | natriuretic peptide receptor 2                                    | -0.659034 | 9.13E-07  | 2.92E-05   | 6                | darkturquoise |
| ENSG00000080815 | PSEN1   | presenilin 1                                                      | -0.109012 | 0.1075402 | 0.1762206  | 25               | darkturquoise |

Supplementary Table 1.

| <b>Transcripts down regulated in patient cells</b> | <b>Function</b>                                                 | <b>Phenotypes in human/animal models</b>                                                   | <b>Reference</b>                                                         |
|----------------------------------------------------|-----------------------------------------------------------------|--------------------------------------------------------------------------------------------|--------------------------------------------------------------------------|
| BRINP2                                             | Neurodevelopment; neural cell proliferation; bone morphogenesis | Behavioral defects in mice                                                                 | (Berkowicz et al., 2016)                                                 |
| CDH10                                              | Autism-spectrum Disorder-like                                   | Cell Adhesion                                                                              | (Wang et al., 2009)                                                      |
| CDH12                                              | Schizophrenia                                                   | Cell Adhesion                                                                              | (Redies et al., 2012)                                                    |
| <u>ETV5</u>                                        | Neuronal transcription factor;                                  | Development of hippocampal neurons                                                         | (Fontanet et al., 2018)<br>(Williams et al., 2016)<br>(Liu et al., 2016) |
| GFRA3                                              | Receptor for GFR $\alpha$ 3/GDNF                                | Development of axonal projections                                                          | PNAS (Souza et al., 2010)<br>(Schaller et al., 2017)                     |
| ISLR2                                              | Receptor for LRR                                                | Forebrain development; axon routing                                                        | (Abudureyimu et al., 2018)<br>(Panza et al., 2015)                       |
| KCNIP2                                             | Ion channel subunit;                                            | Homeostasis in hippocampal neurons; susceptibility to epilepsy; Ca <sup>2+</sup> transient | (Wang et al., 2013)<br>(Nassal et al., 2017)                             |
| KIRREL3                                            | Cell adhesion; synaptic adhesion                                | Intellectual disability gene; autism, Jacobsen's syndrome                                  | (Martin et al., 2015) (Bhalla et al., 2008) (Guerin et al., 2012)        |
| <u>NR4A2</u>                                       | Orphan receptor                                                 | Parkinson's, Alzheimer's                                                                   | (Moon et al., 2019)                                                      |
| RET                                                | RET Tyr kinase signaling                                        | Hirschsprung's disease                                                                     | (Tomuschat et al., 2015)                                                 |
| <u>SOX14</u>                                       | Cerebello-olivary projections                                   | Cerebellar functions                                                                       | (Prekop et al., 2018)                                                    |
| <u>TAL1</u>                                        | bHLH transcription factor                                       | GABAergic neurogenesis; Post mitotic neuronal features                                     | (Achim et al., 2013; Lee et al., 2017)                                   |
| NPR2                                               | natriuretic peptide receptor 2                                  | synaptic connections between axons; axon bifurcation                                       | (Lu et al., 2014; Ter-Avetisyan et al., 2018)                            |
| DMC1                                               | Rec A homolog                                                   | <i>neuronal</i> survival and differentiation                                               | (Rivera et al., 2015)                                                    |
| EN1                                                | Homeobox transcription factor                                   | Cerebellar development                                                                     | (Martinez et al., 2013; Orvis et al., 2012)                              |

**Supplementary Table 2**

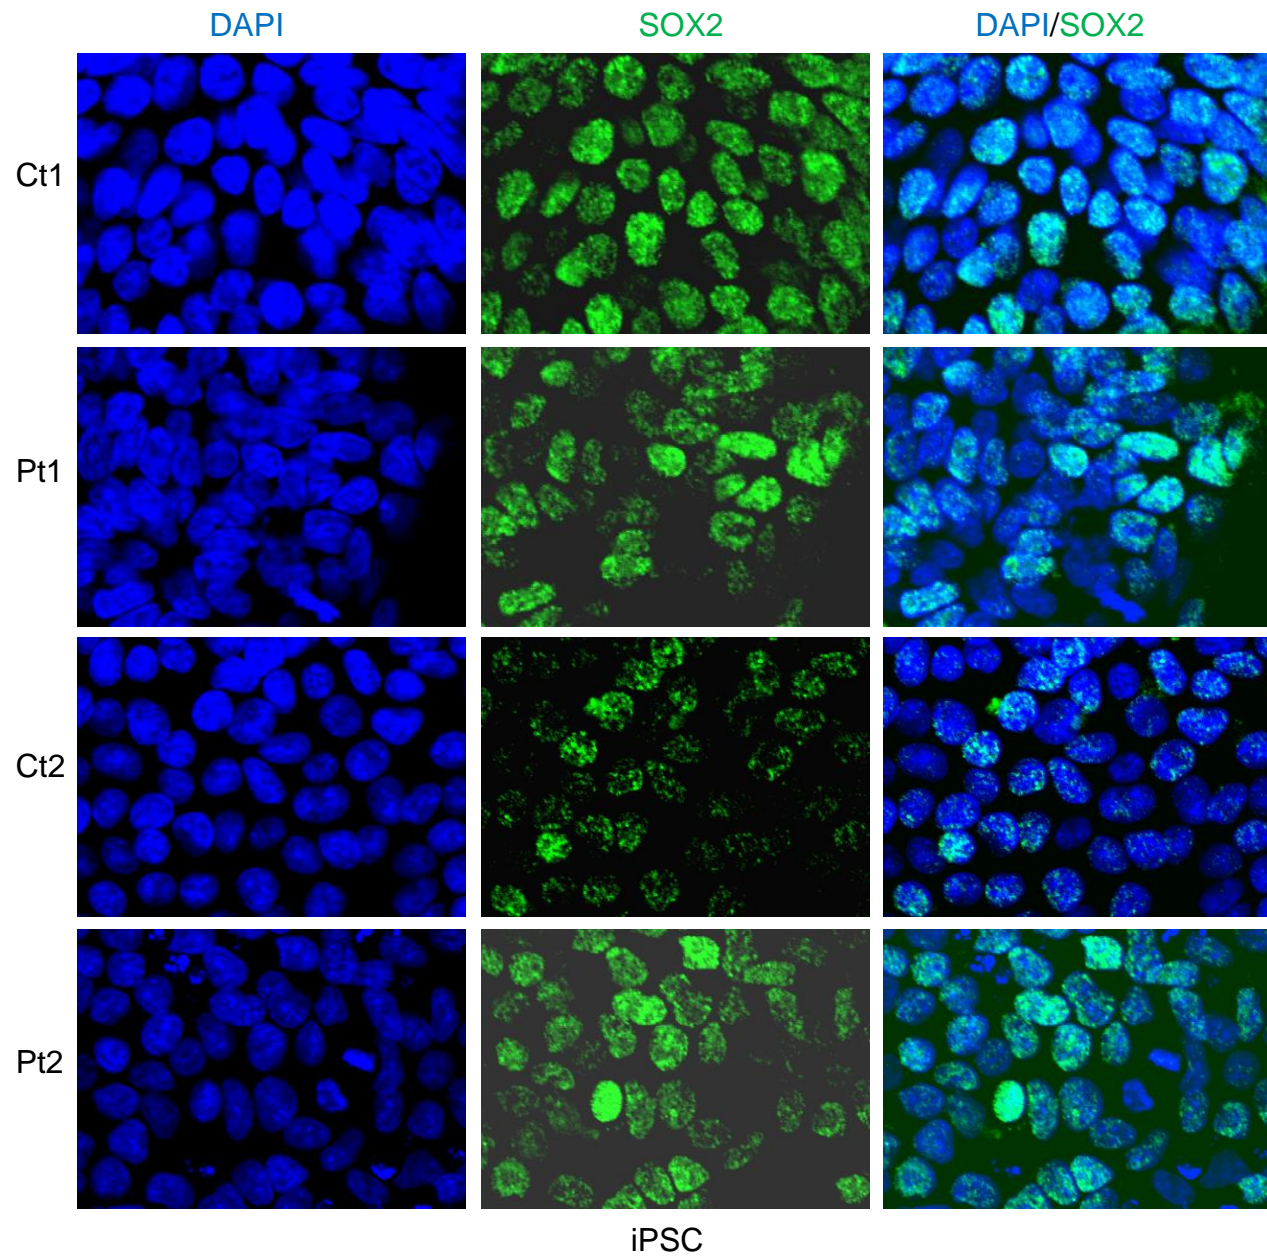

iPSC

Fig. S1A

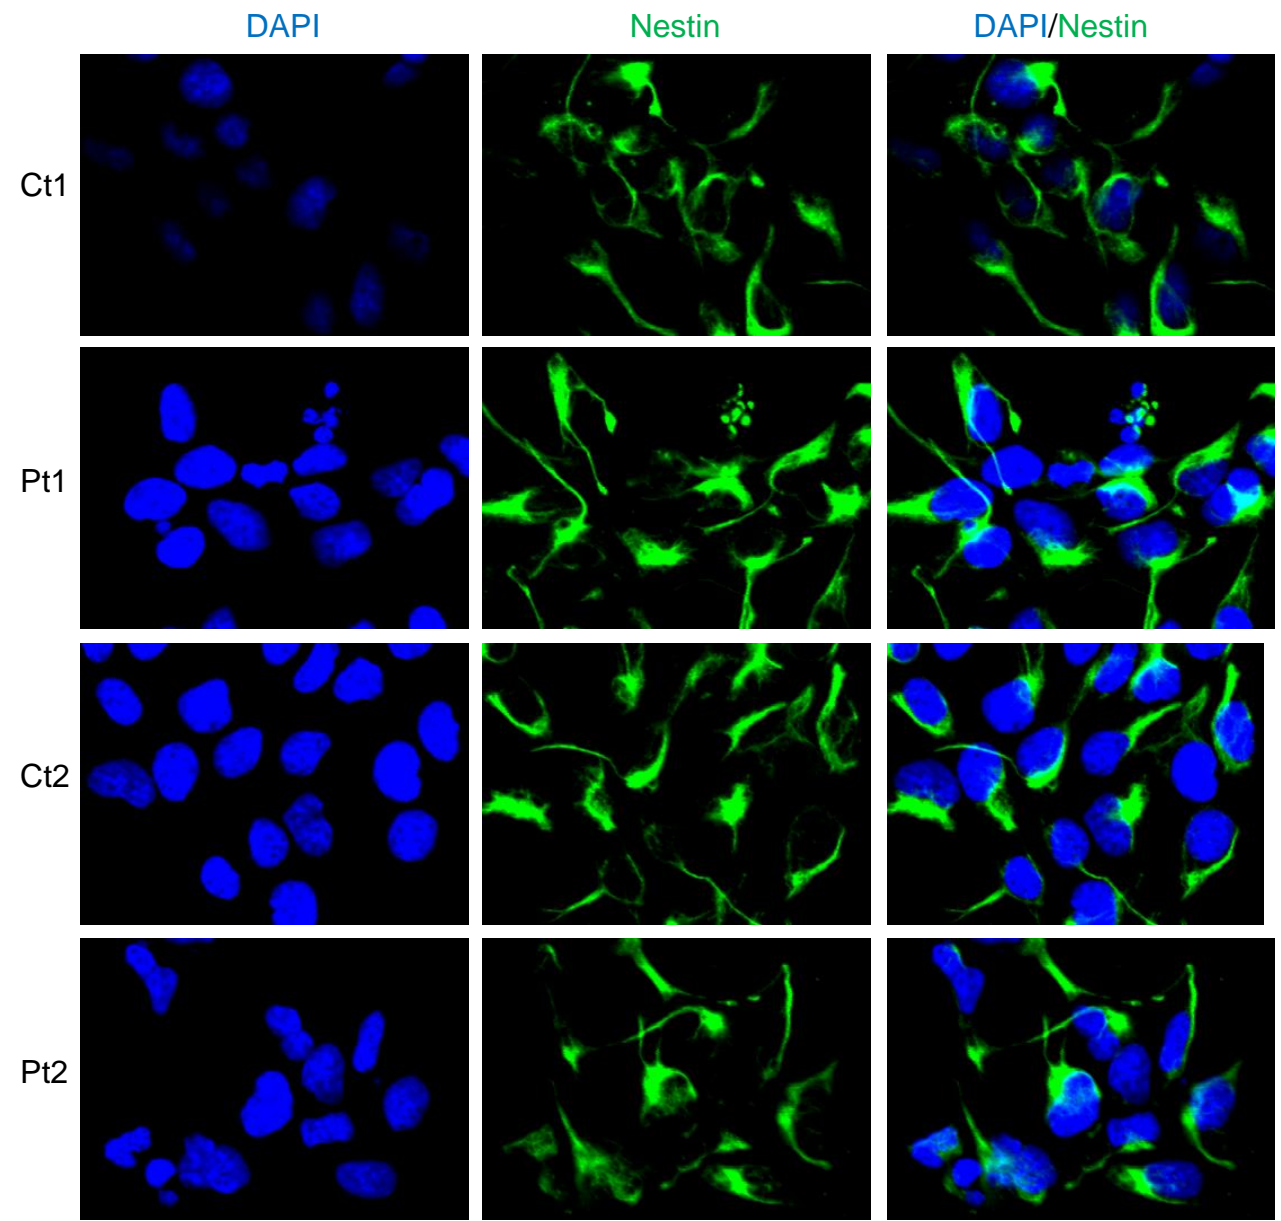

NSC

Fig. S1B

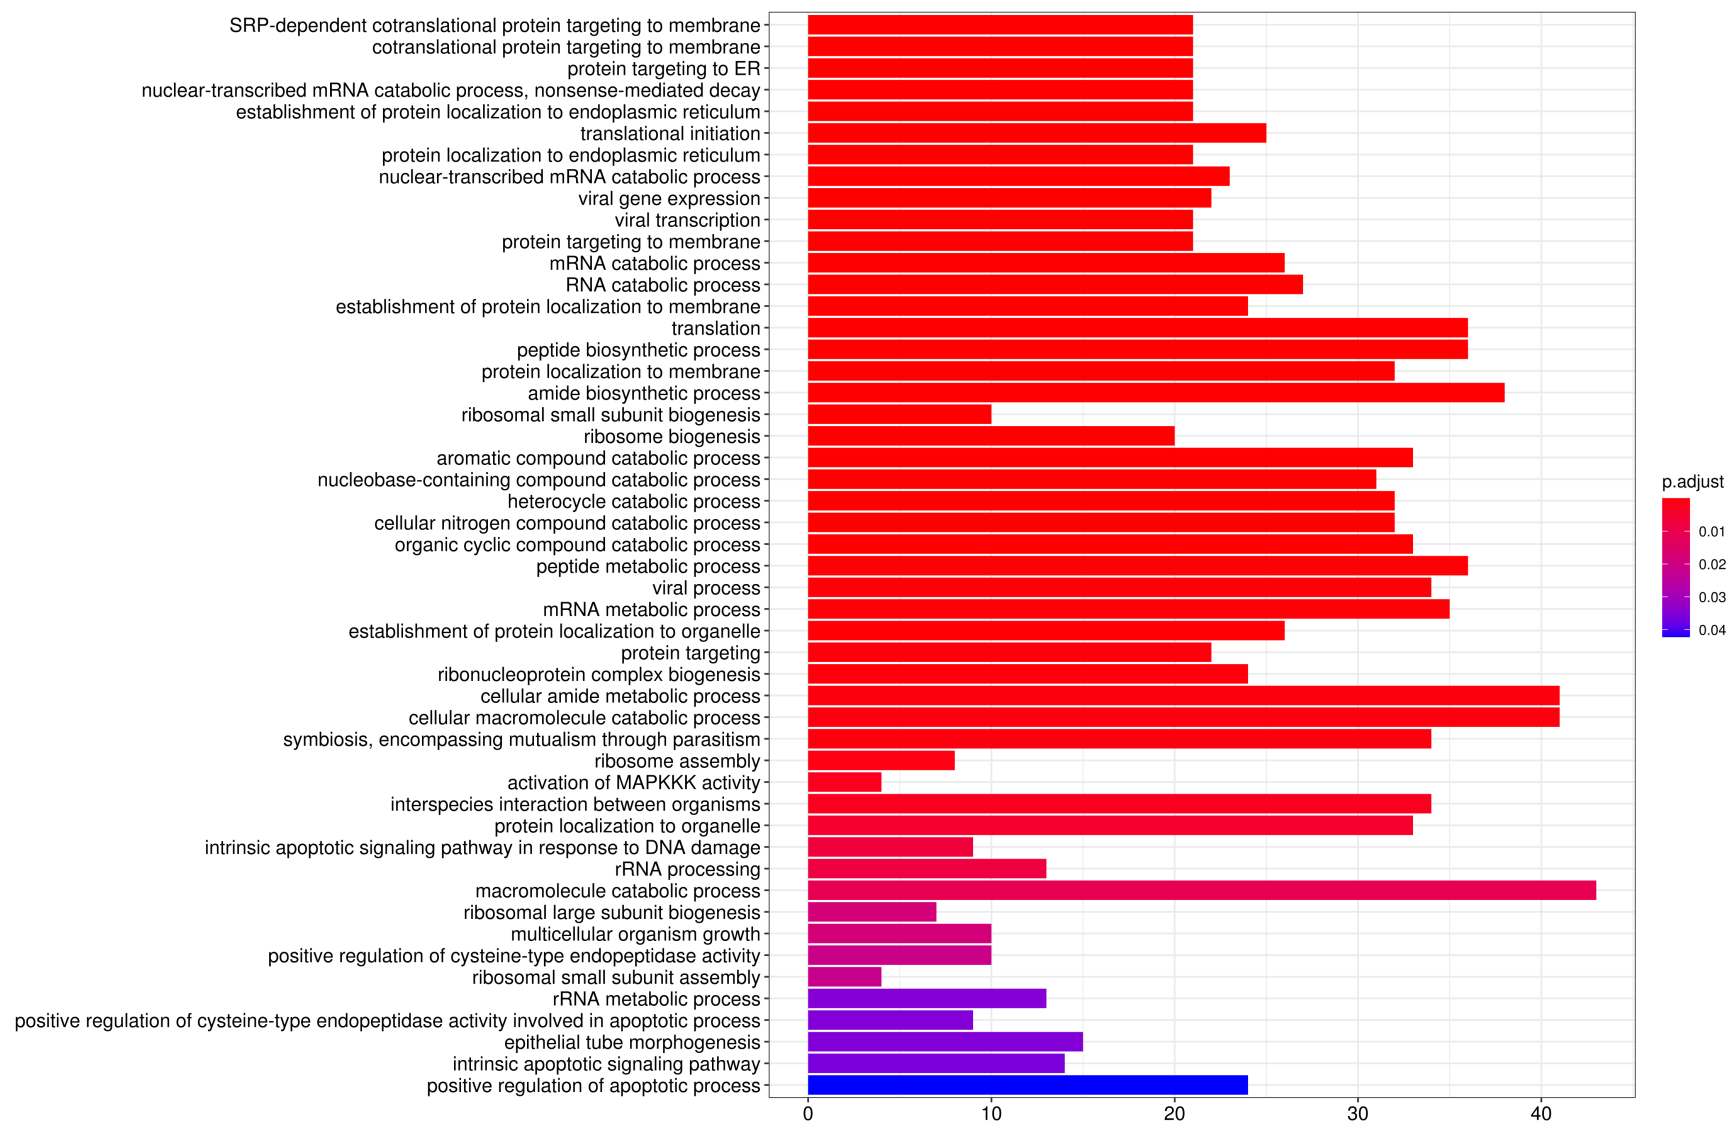

Fig. S2A

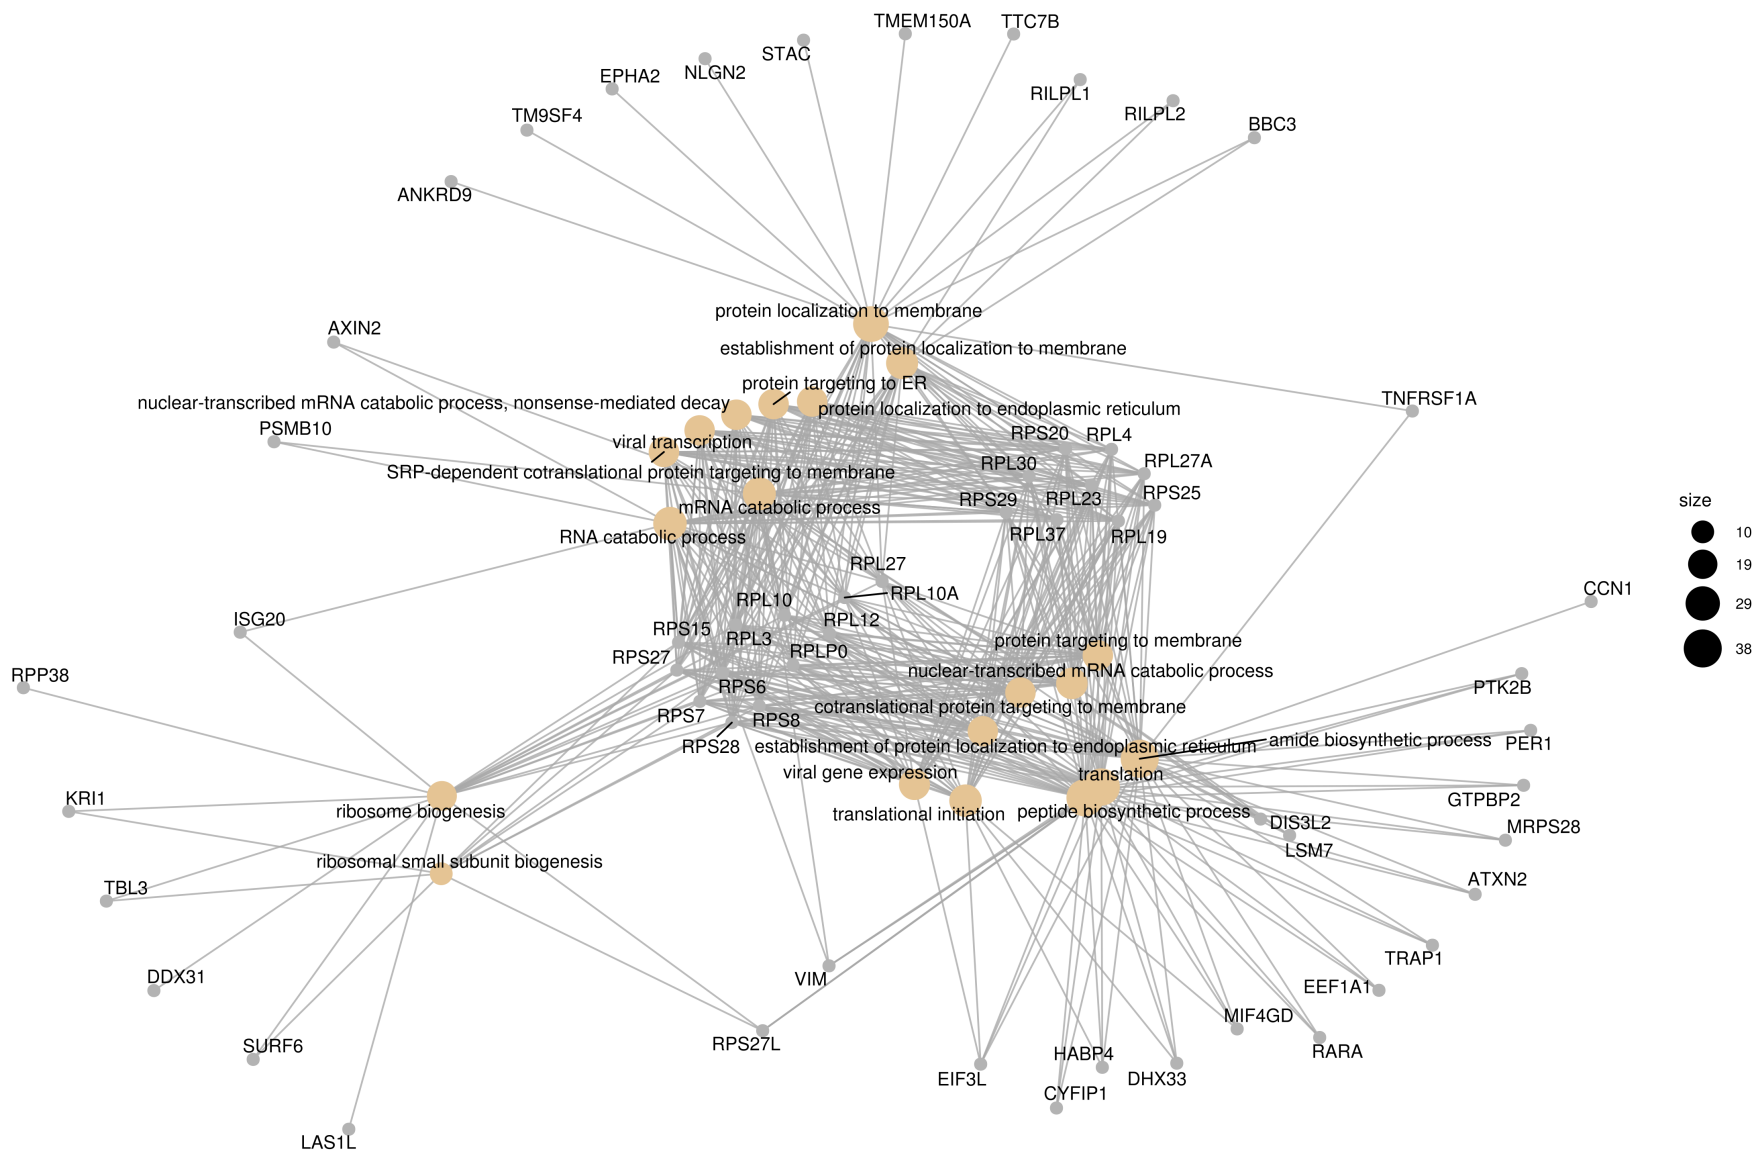

Fig. S2B

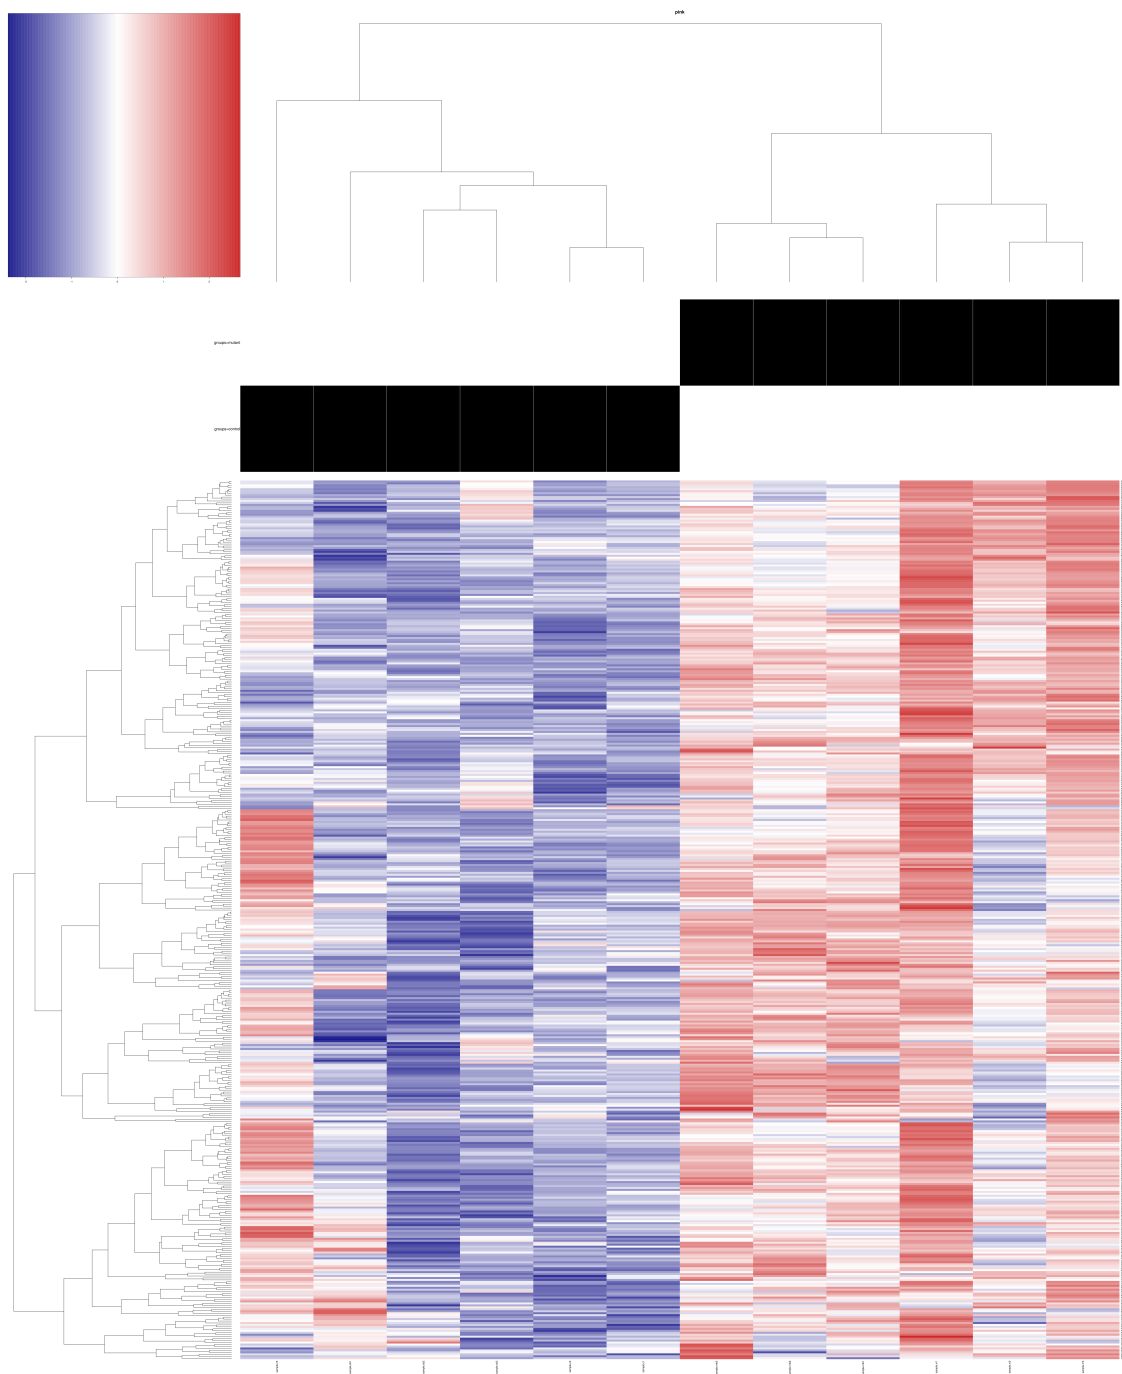

Fig. S2C

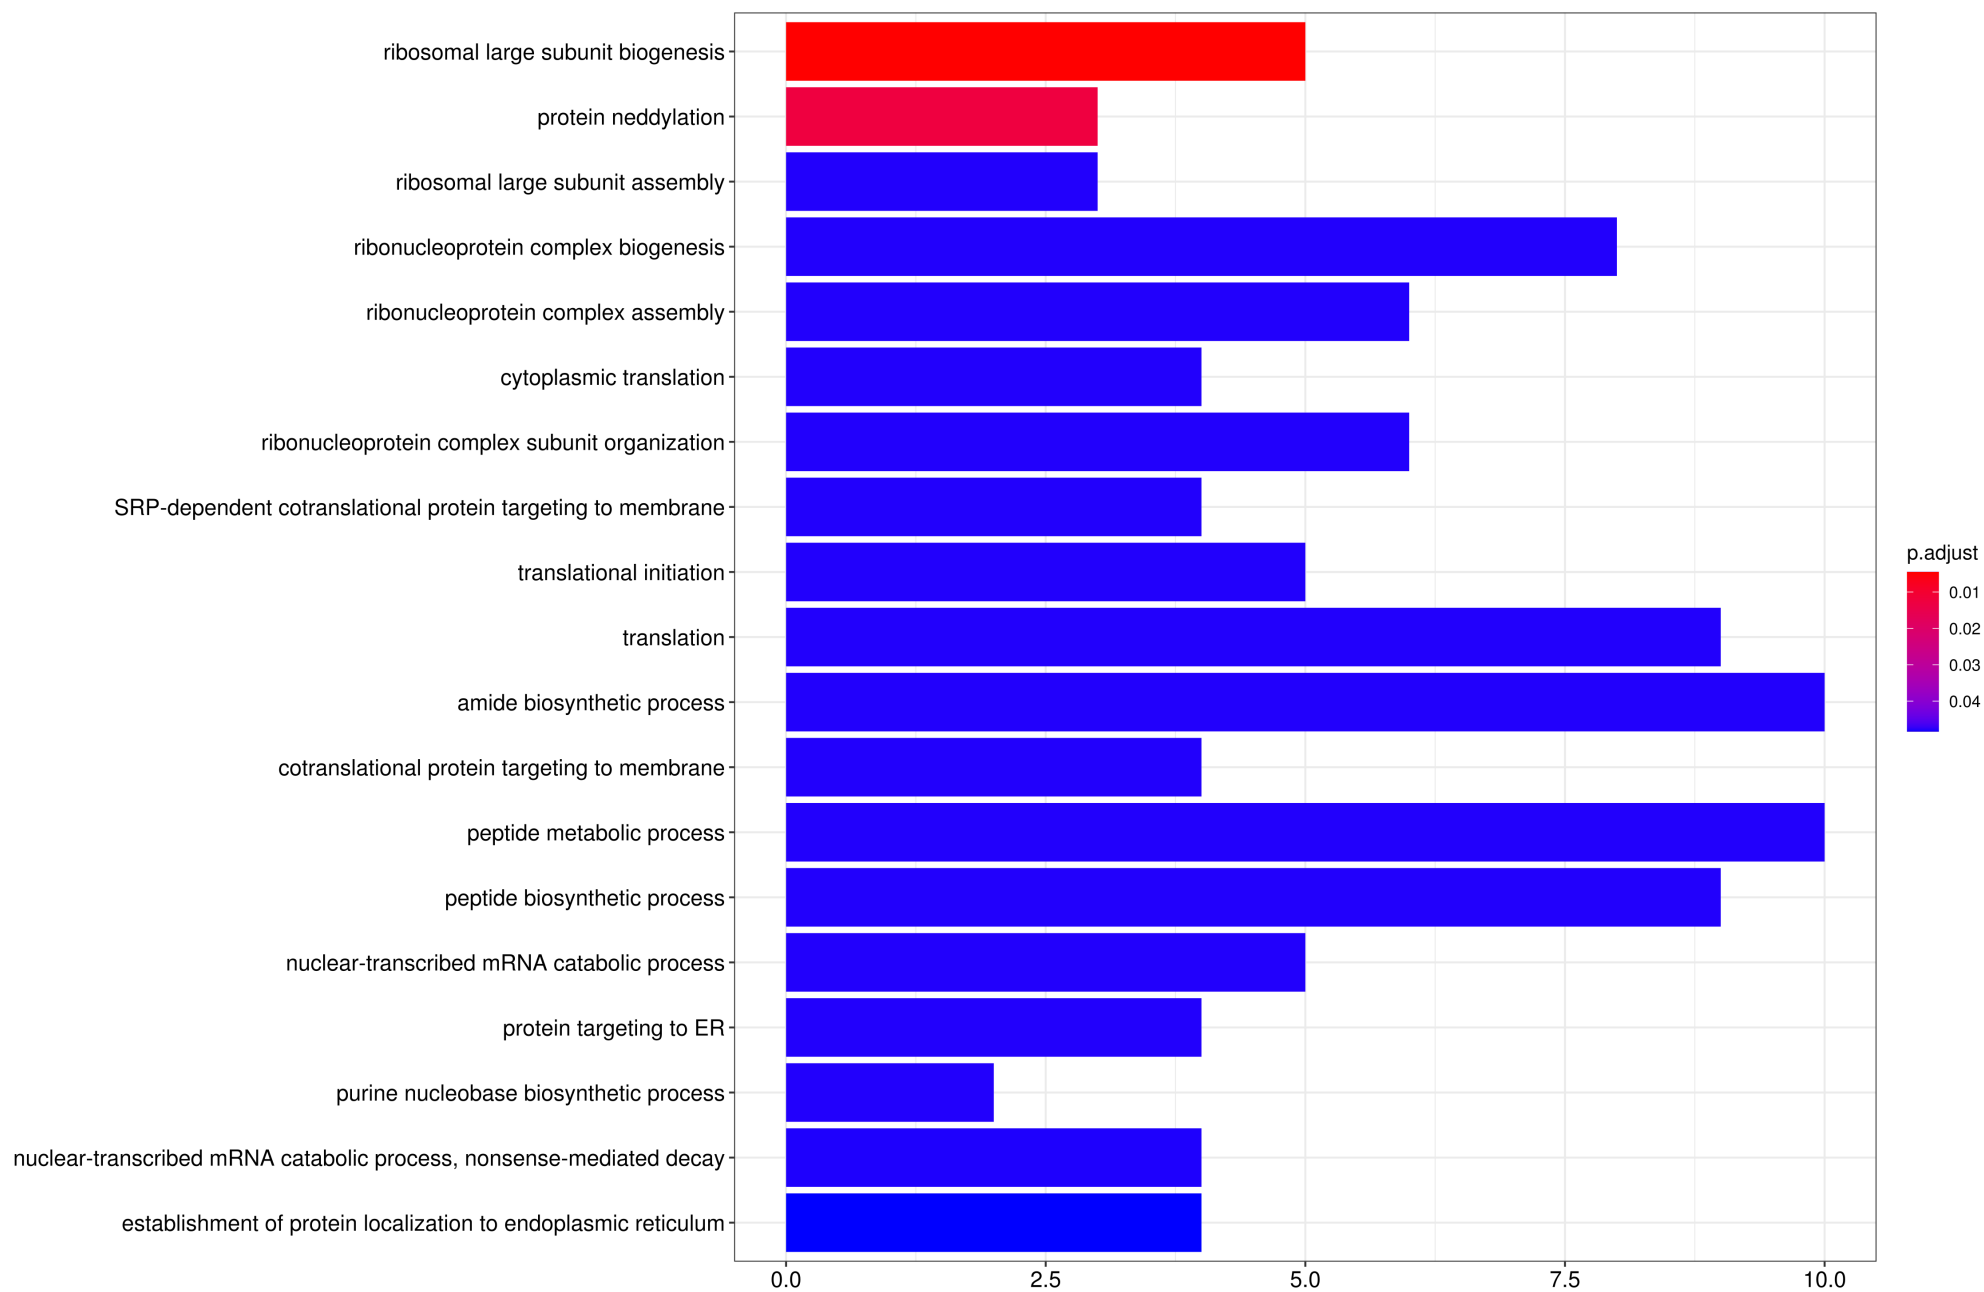

Fig. S3A



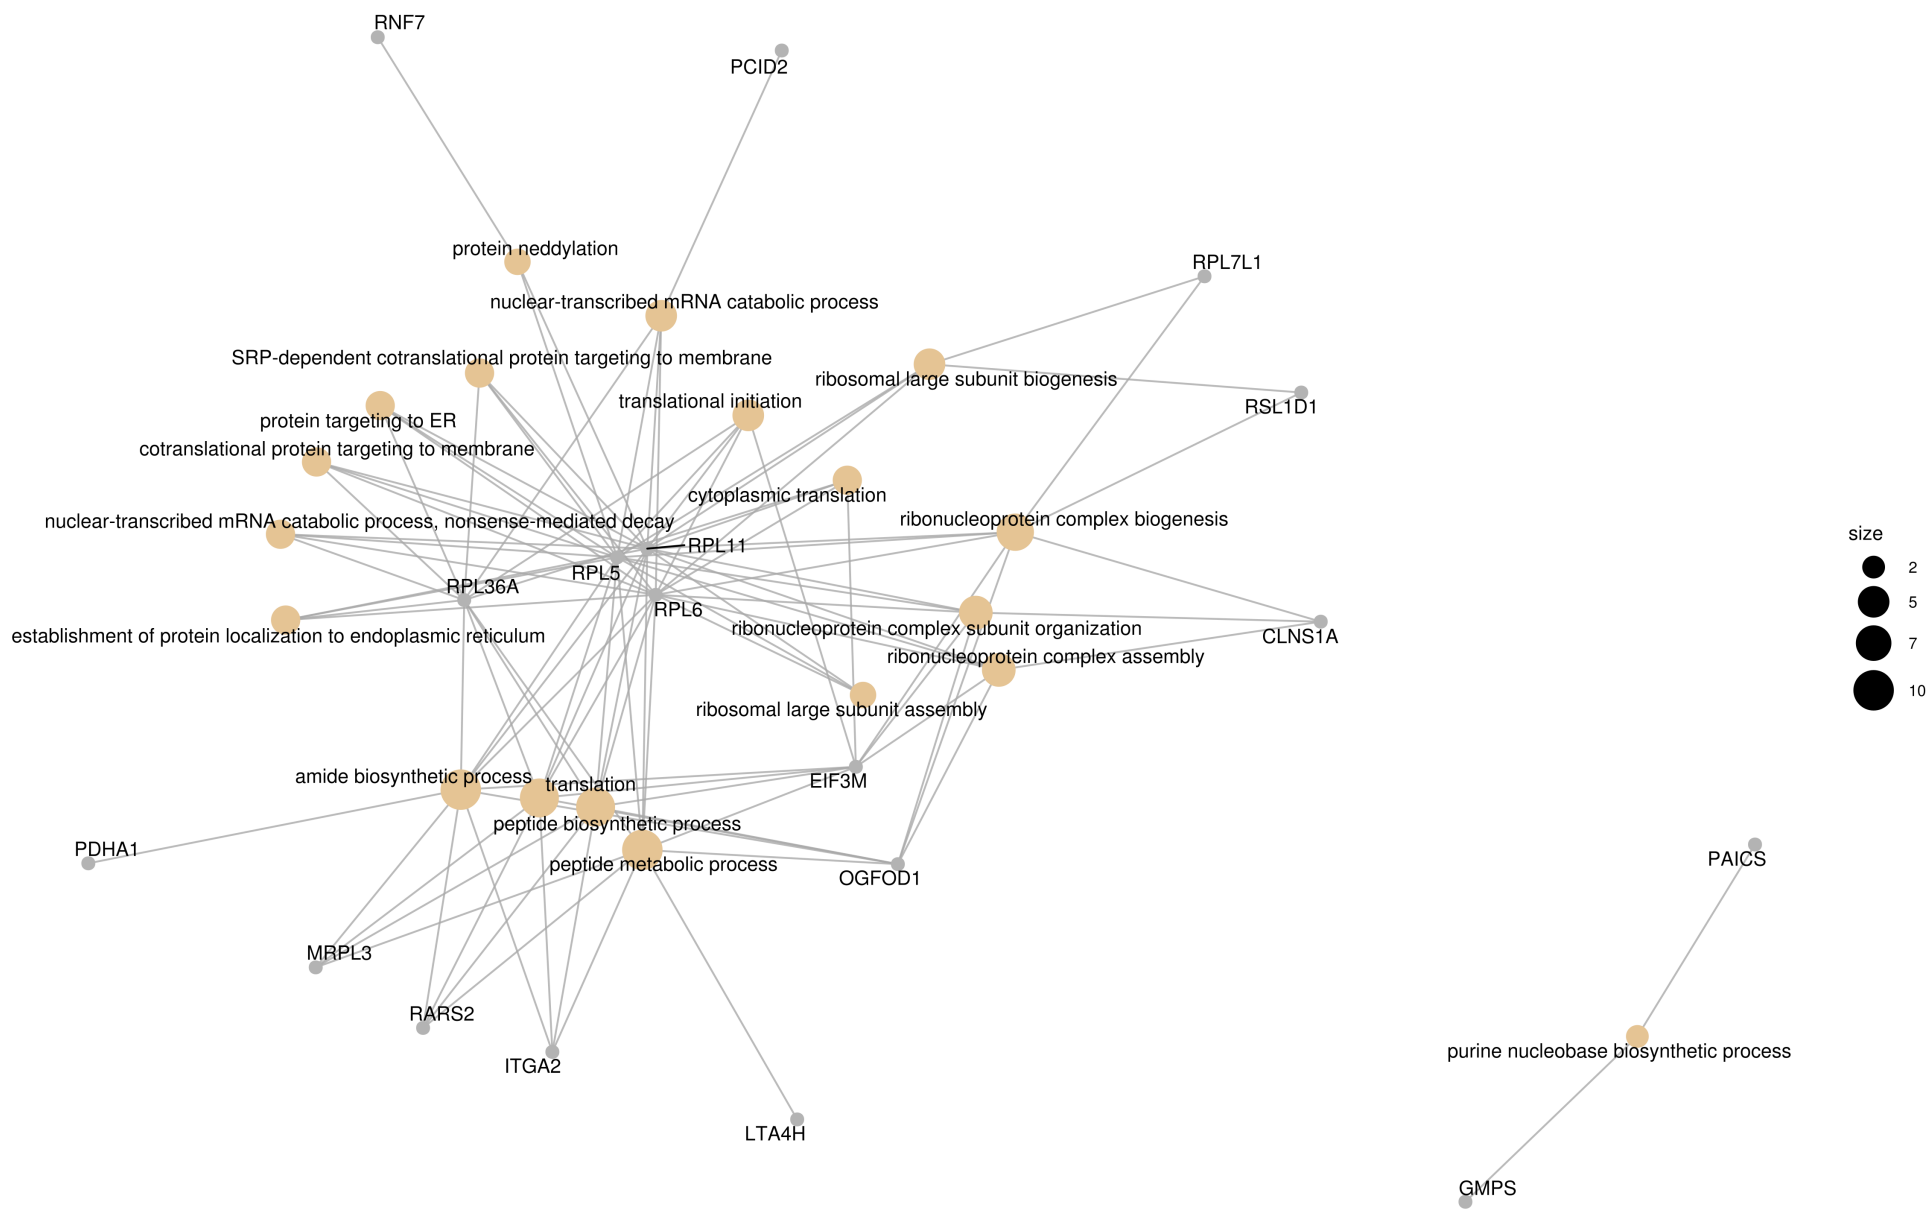

Fig. S3B

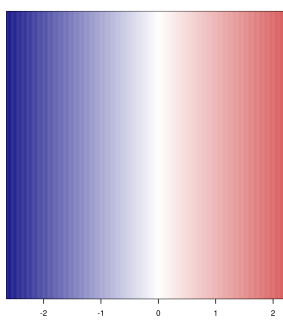

white

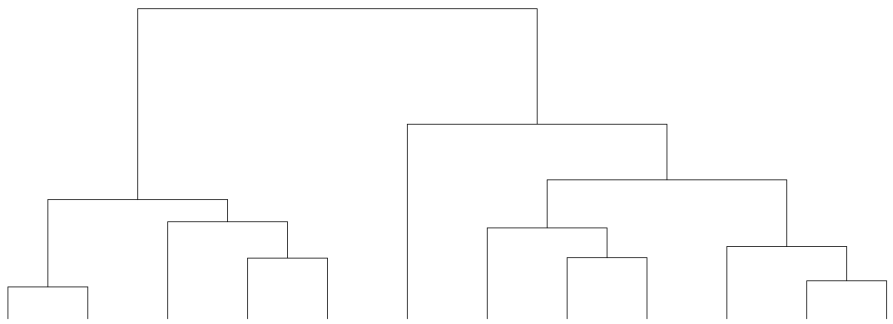

groups=mutant

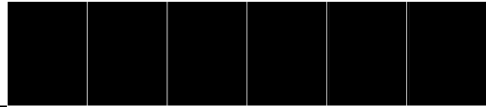

groups=control

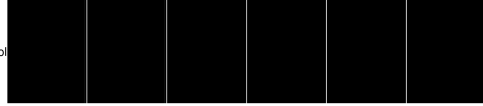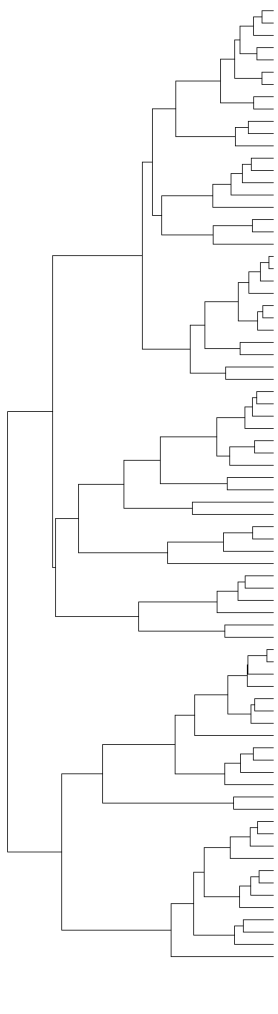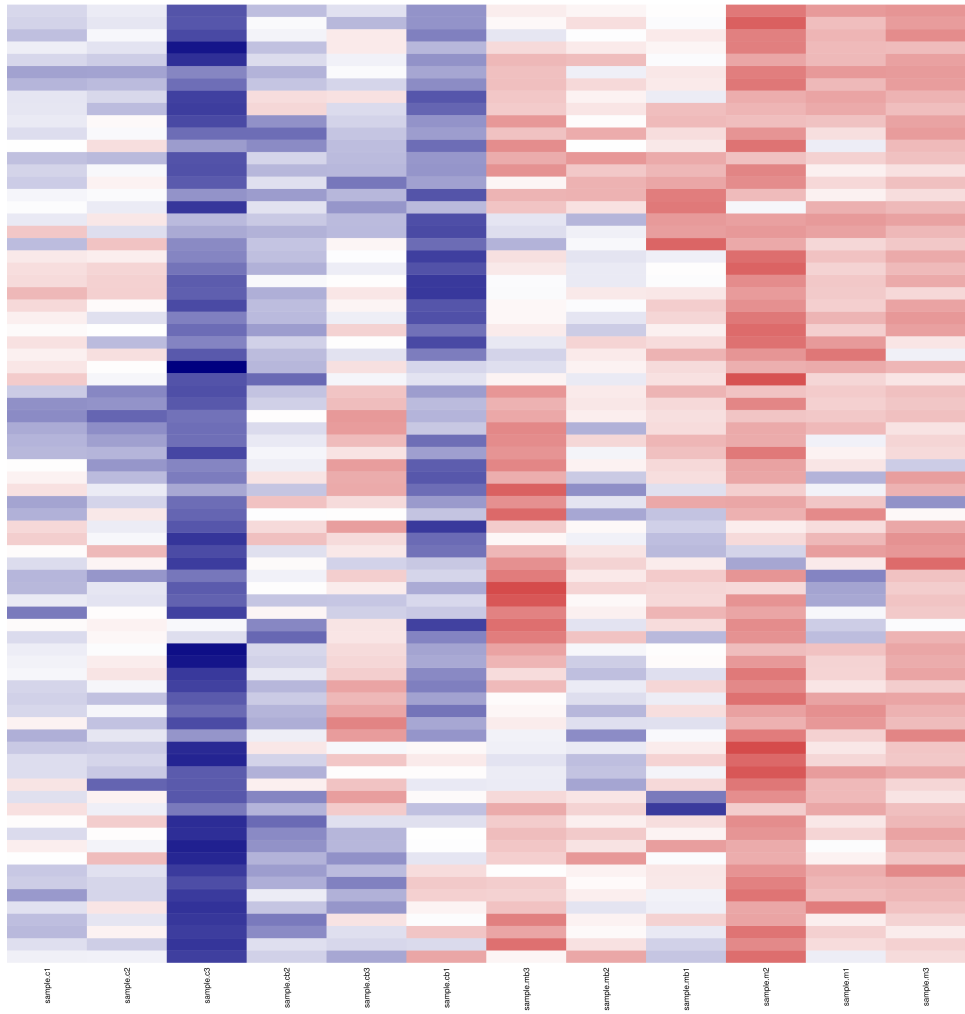

Genes

Fig. S3C

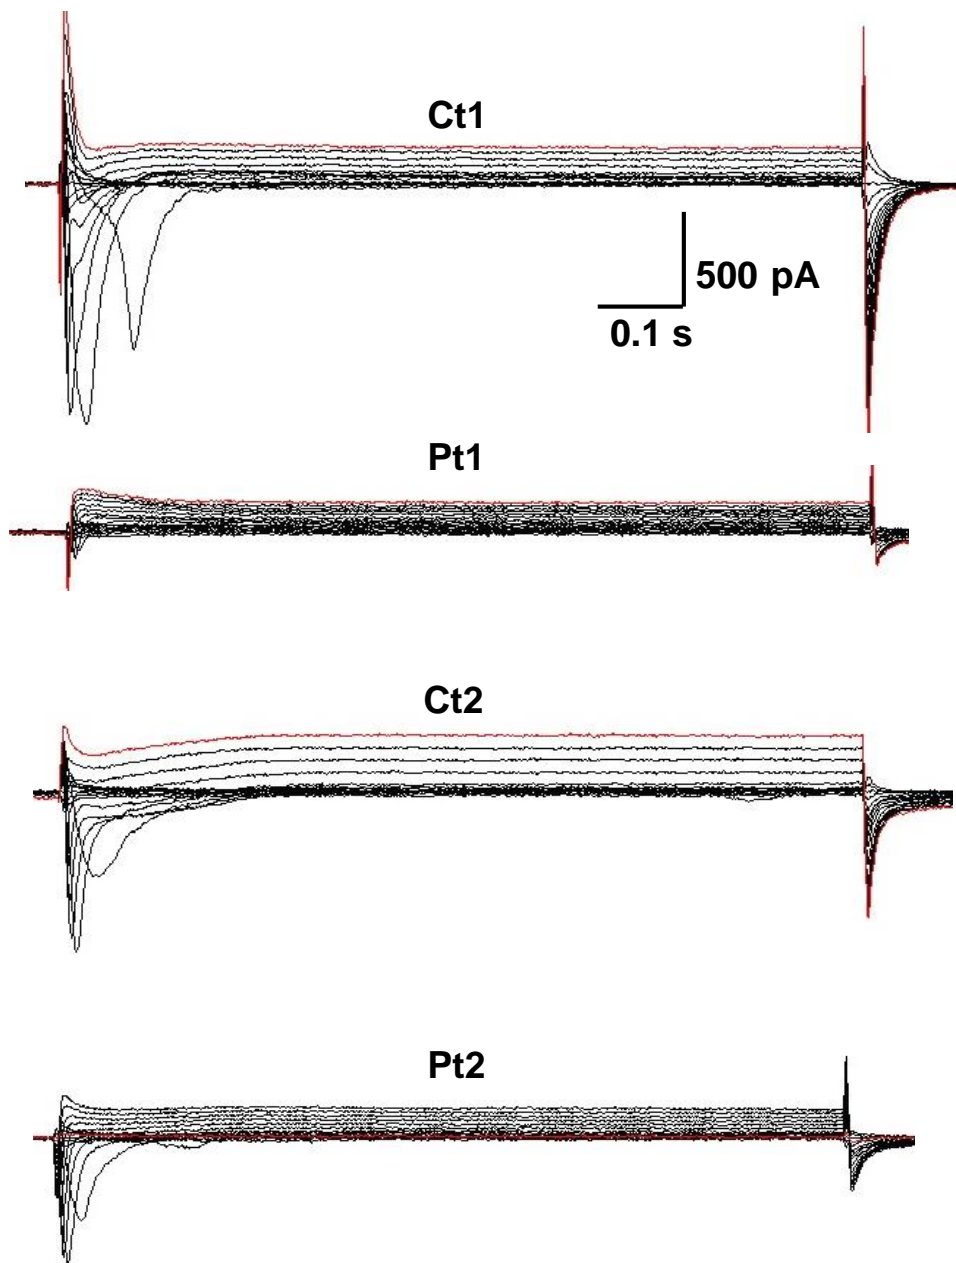

Fig. S4

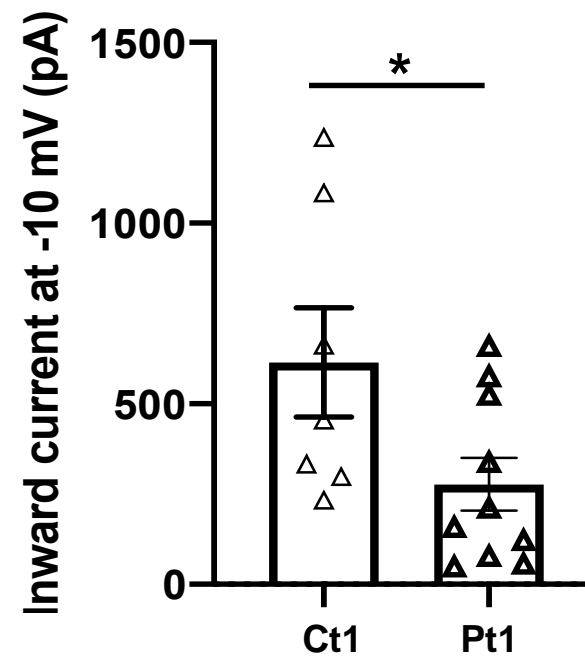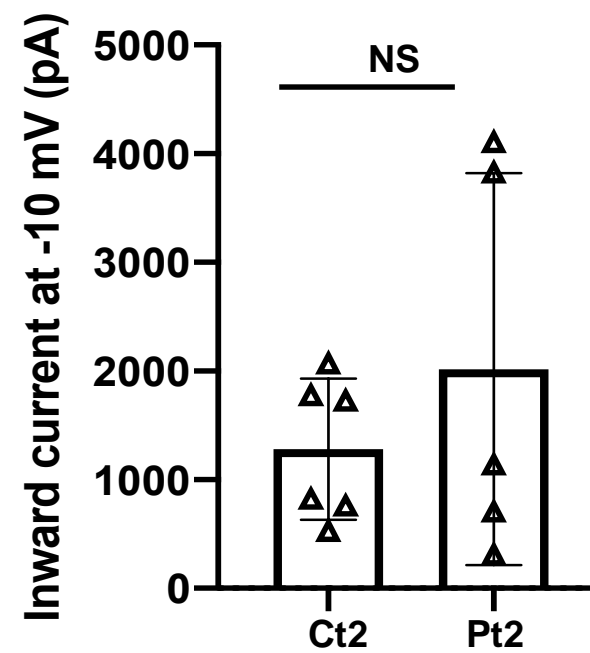

Supplement: Data_Sheet_1.pdf [file Data_Sheet_1.pdf]
